# Supplementary material
Source: PubMed Central journal article supplement (PMC9758392)
Supplement: mmc1.pdf [file mmc1.pdf]

# INDIVIDUAL CONFLICT OF INTEREST STATEMENT

## *American Association of Hip and Knee Surgeons*

(Adopted from the American Academy of Orthopaedic Surgeons disclosure statement)

The following form **must be filled out completely and submitted by each author (example, 6 authors, 6 forms).**  
**All items require a response. If there is no relevant disclosure for a given item, enter "None."**

Techniques and Strategies to Optimize Efficiencies in the Office and Operating Room: Getting Through the Patient Backlog and Preserving Hospital Resources

---

### Manuscript Title

1. Royalties from a company or supplier (The following conflicts were disclosed)

DJO Surgical, Osteoremedies

2. Speakers bureau/paid presentations for a company or supplier (The following conflicts were disclosed)

None

3A. Paid employee for a company or supplier (The following conflicts were disclosed)

None

3B. Paid consultant for a company or supplier (The following conflicts were disclosed)

DJO, Osteoremedies, Kinamed, KCI, SCA

3C. Unpaid consultants for a company or supplier (The following conflicts were disclosed)

None

4. Stock or stock options in a company or supplier (The following conflicts were disclosed)

Emovi

5. Research support from a company or supplier as a Principal Investigator (The following conflicts were disclosed)

DJO

6. Other financial or material support from a company or supplier (The following conflicts were disclosed)

None

7. Royalties, financial or material support from publishers (The following conflicts were disclosed)

None

8. Medical/Orthopaedic publications editorial/governing board (The following conflicts were disclosed)

Journal of Arthroplasty; Orthopedics Today

9. Board member/committee appointments for a society (The following conflicts were disclosed)

ICJR, Knee Society, AAHKS, Hip Society

**Each author must sign AND print or type his/her name, date and submit a separate form**

In addition, one BLINDED Conflict of Interest form (no author names used) should be submitted per manuscript with all author disclosures.

R. Michael Meneghini

*R. Michael Meneghini*

3/1/2021

Author Name (Print or Type)

Author Signature

Date
